# Supplementary material for: Unmet Needs in Real-World Advanced Therapy-Naïve and -Experienced Patients with Moderately to Severely Active Ulcerative Colitis in the United States
Source: PubMed Central journal article supplement — Adv Ther. 2023 Jul 17;40(10):4321–38. doi: 10.1007/s12325-023-02605-y (PMC10499754; doi:10.1007/s12325-023-02605-y), 2023-07-17
Supplement: 12325_2023_2605_MOESM1_ESM.pdf [file 12325_2023_2605_MOESM1_ESM.pdf]

## **Supplementary materials**

### **Unmet Needs in Real-World Advanced Therapy-Naïve and -Experienced Patients with Moderately to Severely Active Ulcerative Colitis in the United States**

Anita Afzali,<sup>1</sup> Rina Lukanova,<sup>2</sup> Fritha Hennessy,<sup>2</sup> Sumie Kakehi,<sup>3</sup> Hannah Knight,<sup>2</sup> Gary Milligan,<sup>2</sup> Komal Gupte-Singh<sup>3</sup>

<sup>1</sup>Division of Digestive Diseases, Department of Internal Medicine, University of Cincinnati, College of Medicine, Cincinnati, OH, USA

<sup>2</sup>Adelphi Real World, Bollington, UK

<sup>3</sup>Bristol Myers Squibb, Princeton, NJ, USA

#### **Corresponding Author:**

Anita Afzali

231 Albert Sabin Way, ML 0551, Room 6065; Cincinnati, OH 45267, USA

Email: afzaliaa@ucmail.uc.edu

## Contents

**Supplementary Table 1** Symptom groups used in the responder cluster analysis

**Supplementary Table 2** AT status, responder status, and current treatment according to patients' sex in the 2017–2018 cohort ( $n = 539$ ) and 2020–2021 cohort ( $n = 448$ )

**Supplementary Table 3** AT status, responder status, and current treatment according to patient age in the 2017–2018 cohort ( $n = 539$ ) and 2020–2021 cohort ( $n = 448$ )

**Supplementary Table 4** Physician-reported reasons for switching treatment to current treatment in AT-naïve patients in the 2017–2018 cohort ( $n = 187$ ) who had received a previous treatment

**Supplementary Table 5** Physician-reported reasons for switching treatment to current treatment in AT-experienced patients in the 2017–2018 cohort ( $n = 154$ )

**Supplementary Table 6** Physician-reported reasons for switching treatment to current treatment in AT-naïve patients in the 2020–2021 cohort ( $n = 36$ ) who had received a previous treatment

**Supplementary Table 7** Physician-reported reasons for switching treatment to current treatment in AT-experienced patients in the 2020–2021 cohort ( $n = 224$ )

**Supplementary Table 1** Symptom groups used in the responder cluster analysis

| <b>General symptom groups</b>     | <b>Symptoms collected from survey</b>                                                                                                                       |
|-----------------------------------|-------------------------------------------------------------------------------------------------------------------------------------------------------------|
| Directly gastrointestinal-related | Abdominal cramps<br>Abdominal pain<br>Colic<br>Diarrhea–bloody<br>Rectal bleeding<br>Bowel movement urgency<br>Nighttime bowel movement urgency<br>Tenesmus |
| Extra-intestinal                  | Vomiting/nausea<br>Loss of appetite<br>Weight loss<br>Anorexia<br>Night sweats<br>Fever                                                                     |
| Anorectal                         | Anal discharge/passing of mucus<br>Rapid postprandial bowel movements                                                                                       |
| Rheumatic                         | Arthralgia<br>Joint swelling<br>Back pain                                                                                                                   |
| Bloating-related                  | Abdominal distension; bloating<br>Flatulence                                                                                                                |
| Diarrhea; non-bloody              | Diarrhea–non-bloody                                                                                                                                         |
| Fatigue-related                   | Anemia<br>Fatigue/tiredness                                                                                                                                 |

**Supplementary Table 2** AT status, responder status, and current treatment according to patients' sex in the 2017–2018 cohort ( $n = 539$ ) and 2020–2021 cohort ( $n = 448$ )

| <i>n</i> (%)                     | 2017–2018 cohort             |                           |                             | 2020–2021 cohort             |                           |                             |
|----------------------------------|------------------------------|---------------------------|-----------------------------|------------------------------|---------------------------|-----------------------------|
|                                  | Overall<br>( <i>n</i> = 539) | Male<br>( <i>n</i> = 264) | Female<br>( <i>n</i> = 275) | Overall<br>( <i>n</i> = 448) | Male<br>( <i>n</i> = 259) | Female<br>( <i>n</i> = 189) |
| AT status                        |                              |                           |                             |                              |                           |                             |
| Naïve                            | 331 (61.4)                   | 171 (64.8)                | 160 (58.2)                  | 99 (22.1)                    | 63 (24.3)                 | 36 (19.0)                   |
| Experienced                      | 208 (38.6)                   | 93 (35.2)                 | 115 (41.8)                  | 349 (77.9)                   | 196 (75.7)                | 153 (81.0)                  |
| <i>p</i> value (male vs. female) |                              | 0.133 <sup>a</sup>        |                             |                              | 0.205 <sup>a</sup>        |                             |
| Derived responder cluster status |                              |                           |                             |                              |                           |                             |
| Responders                       | 231 (42.9)                   | 117 (44.3)                | 114 (41.5)                  | 209 (46.7)                   | 126 (48.6)                | 83 (43.9)                   |
| Non-responders                   | 308 (57.1)                   | 147 (55.7)                | 161 (58.5)                  | 239 (53.3)                   | 133 (51.4)                | 106 (56.1)                  |
| <i>p</i> value (male vs. female) |                              | 0.542 <sup>a</sup>        |                             |                              | 0.339 <sup>a</sup>        |                             |
| Current treatment (hierarchical) |                              |                           |                             |                              |                           |                             |
| None of the following            | 15 (2.8)                     | 5 (1.9)                   | 10 (3.6)                    | 2 (0.4)                      | 2 (0.8)                   | 0                           |
| 5-ASA                            | 167 (31.0)                   | 91 (34.5)                 | 76 (27.6)                   | 50 (11.2)                    | 32 (12.4)                 | 18 (9.5)                    |
| Corticosteroid (± 5-ASA)         | 34 (6.3)                     | 22 (8.3)                  | 12 (4.4)                    | 22 (4.9)                     | 16 (6.2)                  | 6 (3.2)                     |
| IM (± corticosteroid ± 5-ASA)    | 115 (21.3)                   | 53 (20.1)                 | 62 (22.5)                   | 25 (5.6)                     | 13 (5.0)                  | 12 (6.3)                    |
| AT (biologic/biosimilar/JAKi)    | 208 (38.6)                   | 93 (35.2)                 | 115 (41.8)                  | 349 (77.9)                   | 196 (75.7)                | 153 (81.0)                  |
| <i>p</i> value (male vs. female) |                              | 0.067 <sup>b</sup>        |                             |                              | 0.289 <sup>b</sup>        |                             |

<sup>a</sup>Calculated using Fisher exact test. <sup>b</sup>Calculated using chi-square test

5-ASA 5-aminosalicylic acid, AT advanced therapy, JAKi Janus kinase inhibitor, IM immunomodulator

**Supplementary Table 3** AT status, responder status, and current treatment according to patient age in the 2017–2018 cohort ( $n = 539$ ) and 2020–2021 cohort ( $n = 448$ )

| <i>n</i> (%)                                   | 2017–2018 cohort             |                                         |                                         |                                       | 2020–2021 cohort             |                                         |                                         |                                       |
|------------------------------------------------|------------------------------|-----------------------------------------|-----------------------------------------|---------------------------------------|------------------------------|-----------------------------------------|-----------------------------------------|---------------------------------------|
|                                                | Overall<br>( <i>n</i> = 539) | Age<br>18–34 years<br>( <i>n</i> = 184) | Age<br>35–49 years<br>( <i>n</i> = 176) | Age<br>≥50 years<br>( <i>n</i> = 179) | Overall<br>( <i>n</i> = 448) | Age<br>18–34 years<br>( <i>n</i> = 178) | Age<br>35–49 years<br>( <i>n</i> = 165) | Age<br>≥50 years<br>( <i>n</i> = 105) |
| AT status                                      |                              |                                         |                                         |                                       |                              |                                         |                                         |                                       |
| Naïve                                          | 331 (61.4)                   | 118 (64.1)                              | 109 (61.9)                              | 104 (58.1)                            | 99 (22.1)                    | 37 (20.8)                               | 36 (21.8)                               | 26 (24.8)                             |
| Experienced                                    | 208 (38.6)                   | 66 (35.9)                               | 67 (38.1)                               | 75 (41.9)                             | 349 (77.9)                   | 141 (79.2)                              | 129 (78.2)                              | 79 (75.2)                             |
| <i>p</i> value (18–34 vs. 35–49 vs. ≥50 years) |                              |                                         | 0.491 <sup>a</sup>                      |                                       |                              |                                         | 0.734 <sup>a</sup>                      |                                       |
| Derived responder cluster status               |                              |                                         |                                         |                                       |                              |                                         |                                         |                                       |
| Responders                                     | 231 (42.9)                   | 78 (42.4)                               | 61 (34.7)                               | 92 (51.4)                             | 209 (46.7)                   | 88 (49.4)                               | 72 (43.6)                               | 49 (46.7)                             |
| Non-responders                                 | 308 (57.1)                   | 106 (57.6)                              | 115 (65.3)                              | 87 (48.6)                             | 239 (53.3)                   | 90 (50.6)                               | 93 (56.4)                               | 56 (53.3)                             |
| <i>p</i> value (18–34 vs. 35–49 vs. ≥50 years) |                              |                                         | 0.006 <sup>a</sup>                      |                                       |                              |                                         | 0.560 <sup>a</sup>                      |                                       |
| Current treatment (hierarchical)               |                              |                                         |                                         |                                       |                              |                                         |                                         |                                       |
| None of the following                          | 15 (2.8)                     | 4 (2.2)                                 | 1 (0.6)                                 | 10 (5.6)                              | 2 (0.4)                      | 0 (0.0)                                 | 1 (0.6)                                 | 1 (1.0)                               |
| 5-ASA                                          | 167 (31.0)                   | 76 (41.3)                               | 42 (23.9)                               | 49 (27.4)                             | 50 (11.2)                    | 19 (10.7)                               | 19 (11.5)                               | 12 (11.4)                             |
| Corticosteroid (± 5-ASA)                       | 34 (6.3)                     | 16 (8.7)                                | 11 (6.3)                                | 7 (3.9)                               | 22 (4.9)                     | 10 (5.6)                                | 6 (3.6)                                 | 6 (5.7)                               |
| IM (± corticosteroid ± 5-ASA)                  | 115 (21.3)                   | 22 (12.0)                               | 55 (31.3)                               | 38 (21.2)                             | 25 (5.6)                     | 8 (4.5)                                 | 10 (6.1)                                | 7 (6.7)                               |
| AT                                             | 208 (38.6)                   |                                         |                                         |                                       | 349 (77.9)                   |                                         |                                         |                                       |
| (biologic/biosimilar/JAKi)                     |                              | 66 (35.9)                               | 67 (38.1)                               | 75 (41.9)                             |                              | 141 (79.2)                              | 129 (78.2)                              | 79 (75.2)                             |
| <i>p</i> value (18–34 vs. 35–49 vs. ≥50 years) |                              |                                         | <0.001 <sup>a</sup>                     |                                       |                              |                                         | 0.920 <sup>a</sup>                      |                                       |

<sup>a</sup>Calculated using chi-square test

5-ASA 5-aminosalicylic acid, AT advanced therapy, JAKi Janus kinase inhibitor, IM immunomodulator

**Supplementary Table 4** Physician-reported reasons for switching treatment to current treatment in AT-naïve patients in the 2017–2018 cohort ( $n = 187$ ) who had received a previous treatment

| <i>n</i> (%)                                                               | <b>Responders<br/>(<i>n</i> = 51)</b> | <b>Non-responders<br/>(<i>n</i> = 136)</b> |
|----------------------------------------------------------------------------|---------------------------------------|--------------------------------------------|
| Lack of alleviation of pain                                                | 3 (5.9)                               | 84 (61.8)                                  |
| Secondary lack of efficacy (loss of response over time)/condition worsened | 8 (15.7)                              | 66 (48.5)                                  |
| Treatment did not clear the patient’s diarrheal symptoms specifically      | 2 (3.9)                               | 69 (50.7)                                  |
| I wanted to use an AT that can be used as a monotherapy                    | 3 (5.9)                               | 62 (45.6)                                  |
| Remission not induced                                                      | 10 (19.6)                             | 48 (35.3)                                  |
| Remission not maintained                                                   | 6 (11.8)                              | 44 (32.4)                                  |
| Condition improved                                                         | 25 (49.0)                             | 8 (5.9)                                    |
| Side effects                                                               | 11 (21.6)                             | 8 (5.9)                                    |
| Primary lack of efficacy (initial non-response)                            | 9 (17.6)                              | 6 (4.4)                                    |
| Lack of tolerability                                                       | 2 (3.9)                               | 5 (3.7)                                    |
| Patient request to change drug                                             | 3 (5.9)                               | 2 (1.5)                                    |
| Comorbidities                                                              | 3 (5.9)                               | 1 (0.7)                                    |
| Fewer administrative hurdles                                               | 0                                     | 3 (2.2)                                    |
| Patient out-of-pocket expense                                              | 1 (2.0)                               | 1 (0.7)                                    |
| Formulary-driven switch                                                    | 1 (2.0)                               | 1 (0.7)                                    |
| Lack of compliance by patient                                              | 0                                     | 2 (1.5)                                    |
| Test/laboratory results required switch                                    | 1 (2.0)                               | 0                                          |
| Administration reaction                                                    | 1 (2.0)                               | 0                                          |
| I wanted to use an AT that can be used in combination with biologics       | 0                                     | 1 (0.7)                                    |
| The patient required an AT with a different mode of action                 | 1 (2.0)                               | 0                                          |
| Insurance restrictions                                                     | 1 (2.0)                               | 0                                          |
| Other (specify)                                                            | 1 (2.0)                               | 3 (2.2)                                    |

Ordered according to frequency of occurrence in overall population with the exception of “Other (specify)”

AT advanced therapy

**Supplementary Table 5** Physician-reported reasons for switching treatment to current treatment in AT-experienced patients in the 2017–2018 cohort ( $n = 154$ )

| <i>n</i> (%)                                                               | <b>Responders<br/>(<i>n</i> = 61)</b> | <b>Non-responders<br/>(<i>n</i> = 93)</b> |
|----------------------------------------------------------------------------|---------------------------------------|-------------------------------------------|
| Remission not induced                                                      | 17 (27.9)                             | 47 (50.5)                                 |
| Secondary lack of efficacy (loss of response over time)/condition worsened | 20 (32.8)                             | 40 (43.0)                                 |
| Remission not maintained                                                   | 17 (27.9)                             | 19 (20.4)                                 |
| I wanted to use an AT that can be used as a monotherapy                    | 9 (14.8)                              | 25 (26.9)                                 |
| Primary lack of efficacy (initial non-response)                            | 14 (23.0)                             | 15 (16.1)                                 |
| Lack of alleviation of pain                                                | 6 (9.8)                               | 21 (22.6)                                 |
| Treatment did not clear the patient’s diarrheal symptoms specifically      | 11 (18.0)                             | 15 (16.1)                                 |
| Side effects                                                               | 7 (11.5)                              | 11 (11.8)                                 |
| Condition improved                                                         | 8 (13.1)                              | 4 (4.3)                                   |
| Lack of tolerability                                                       | 5 (8.2)                               | 7 (7.5)                                   |
| The patient required an AT with a different mode of action                 | 5 (8.2)                               | 6 (6.5)                                   |
| Patient request to change drug                                             | 4 (6.6)                               | 6 (6.5)                                   |
| I wanted to use an AT that can be used in combination with biologic        | 2 (3.3)                               | 3 (3.2)                                   |
| Insurance restrictions                                                     | 3 (4.9)                               | 1 (1.1)                                   |
| Formulary-driven switch                                                    | 2 (3.3)                               | 2 (2.2)                                   |
| Administration reaction                                                    | 2 (3.3)                               | 1 (1.1)                                   |
| Patient developed anti-drug antibodies/immunogenic response                | 1 (1.6)                               | 1 (1.1)                                   |
| Test/laboratory results required switch                                    | 2 (3.3)                               | 0                                         |
| Frequency of injections                                                    | 1 (1.6)                               | 1 (1.1)                                   |
| Antibodies to biologic/biosimilar detected                                 | 2 (3.3)                               | 0                                         |
| Comorbidities                                                              | 0                                     | 2 (2.2)                                   |
| Patient dissatisfied with mode of administration                           | 1 (1.6)                               | 0                                         |
| Patient out-of-pocket expense                                              | 1 (1.6)                               | 0                                         |
| Lack of compliance by patient                                              | 1 (1.6)                               | 0                                         |
| Fewer administrative hurdles                                               | 1 (1.6)                               | 0                                         |
| Efficacy of treatment                                                      | 1 (1.6)                               | 0                                         |
| Formulary/listing                                                          | 1 (1.6)                               | 0                                         |
| Other (specify)                                                            | 0                                     | 1 (1.1)                                   |

Ordered according to frequency of occurrence in overall population with the exception of “Other (specify)”

AT advanced therapy

**Supplementary Table 6** Physician-reported reasons for switching treatment to current treatment in AT-naïve patients in the 2020–2021 cohort ( $n = 36$ ) who had received a previous treatment

| <i>n</i> (%)                                                                  | <b>Responders<br/>(<i>n</i> = 16)</b> | <b>Non-responders<br/>(<i>n</i> = 20)</b> |
|-------------------------------------------------------------------------------|---------------------------------------|-------------------------------------------|
| Disease progression                                                           | 6 (37.5)                              | 7 (35.0)                                  |
| Lack of secondary efficacy of previous treatment (loss of response over time) | 4 (25.0)                              | 5 (25.0)                                  |
| Lack of tolerability of previous regimen                                      | 3 (18.8)                              | 6 (30.0)                                  |
| Remission not induced with previous treatment                                 | 3 (18.8)                              | 4 (20.0)                                  |
| Patient poor compliance with previous regimen                                 | 2 (12.5)                              | 4 (20.0)                                  |
| Patient request to switch from previous regimen                               | 3 (18.8)                              | 3 (15.0)                                  |
| Lack of primary efficacy of previous treatment (initial non-response)         | 2 (12.5)                              | 3 (15.0)                                  |
| Remission not maintained with previous treatment                              | 4 (25.0)                              | 1 (5.0)                                   |
| Side effects of previous regimen                                              | 3 (18.8)                              | 2 (10.0)                                  |
| Current treatment is more cost-effective for patient                          | 3 (18.8)                              | 1 (5.0)                                   |
| The patient required an AT with a different mode of action                    | 2 (12.5)                              | 2 (10.0)                                  |
| Flexibility of current dosing regimen                                         | 1 (6.3)                               | 2 (10.0)                                  |
| Lack of flare control with previous treatment                                 | 0                                     | 3 (15.0)                                  |
| Lack of alleviation of pain                                                   | 0                                     | 2 (10.0)                                  |
| Symptomatic control not achieved with previous regimen                        | 1 (6.3)                               | 1 (5.0)                                   |
| Current treatment is more cost-effective for healthcare system                | 1 (6.3)                               | 0                                         |
| Fewer administrative hurdles with current treatment                           | 1 (6.3)                               | 0                                         |
| Insurance coverage of current treatment                                       | 0                                     | 1 (5.0)                                   |
| Other (specify)                                                               | 1 (6.3)                               | 1 (5.0)                                   |

Ordered according to frequency of occurrence in overall population with the exception of “Other (specify)”

AT advanced therapy



**Supplementary Table 7** Physician-reported reasons for switching treatment to current treatment in AT-experienced patients in the 2020–2021 cohort ( $n = 224$ )

| <i>n</i> (%)                                                                  | <b>Responders<br/>(<i>n</i> = 106)</b> | <b>Non-responders<br/>(<i>n</i> = 118)</b> |
|-------------------------------------------------------------------------------|----------------------------------------|--------------------------------------------|
| Lack of secondary efficacy of previous treatment (loss of response over time) | 37 (34.9)                              | 59 (50.0)                                  |
| Lack of flare control with previous treatment                                 | 35 (33.0)                              | 42 (35.6)                                  |
| Disease progression                                                           | 40 (37.7)                              | 35 (29.7)                                  |
| Remission not induced with previous treatment                                 | 41 (38.7)                              | 30 (25.4)                                  |
| Remission not maintained with previous treatment                              | 34 (32.1)                              | 31 (26.3)                                  |
| The patient required an AT with a different mode of action                    | 24 (22.6)                              | 25 (21.2)                                  |
| Lack of primary efficacy of previous treatment (initial non-response)         | 27 (25.5)                              | 20 (16.9)                                  |
| Symptomatic control not achieved with previous regimen                        | 22 (20.8)                              | 14 (11.9)                                  |
| Lack of alleviation of pain                                                   | 9 (8.5)                                | 18 (15.3)                                  |
| Side effects of previous regimen                                              | 11 (10.4)                              | 6 (5.1)                                    |
| Lack of tolerability of previous regimen                                      | 8 (7.5)                                | 6 (5.1)                                    |
| Patient request to switch from previous regimen                               | 7 (6.6)                                | 7 (5.9)                                    |
| Antibodies to biologic/biosimilar detected                                    | 10 (9.4)                               | 3 (2.5)                                    |
| Mode of administration of current regimen is preferred                        | 8 (7.5)                                | 4 (3.4)                                    |
| Current treatment is more cost-effective for patient                          | 4 (3.8)                                | 5 (4.2)                                    |
| Insurance coverage of current treatment                                       | 4 (3.8)                                | 4 (3.4)                                    |
| Patient request to switch to the current regimen                              | 7 (6.6)                                | 0                                          |
| Administration reaction of previous treatment                                 | 3 (2.8)                                | 2 (1.7)                                    |
| Patient poor compliance with previous regimen                                 | 1 (0.9)                                | 4 (3.4)                                    |
| Current treatment is more cost-effective for healthcare system                | 1 (0.9)                                | 2 (1.7)                                    |
| Comorbidities required change of treatment                                    | 0                                      | 1 (0.8)                                    |
| Frequency of injections of previous treatment                                 | 0                                      | 1 (0.8)                                    |
| Other (specify)                                                               | 1 (0.9)                                | 5 (4.2)                                    |

Ordered according to frequency of occurrence in overall population with the exception of “Other (specify)”

AT advanced therapy
